# Supplementary material for: Visible light-initiated selective aerobic oxidation of alcohols over niobium oxide nanowires: an oxygen isotope labeling study
Source: Royal Society of Chemistry journal article supplement (doi:10.1039/d5ta03249k), 2025-01-01
Supplement: d5ta03249k1.pdf [file d5ta03249k1.pdf]

## Supplementary Information

### Visible light-initiated selective aerobic oxidation of alcohols over niobium oxide nanowires: An oxygen isotope labeling study

Xiaoming Ma,<sup>‡a,b</sup> Yuexin Wang,<sup>‡a</sup> Fulin Zhang,<sup>a</sup> Guoqing Zhu,<sup>c</sup> Shuolin Zhou,<sup>\*a,d</sup> and Xianjun Lang<sup>\*a</sup>

*<sup>a</sup>Hubei Key Lab on Organic and Polymeric Optoelectronic Materials, College of Chemistry and Molecular Sciences, Wuhan University, Wuhan 430072, China.*

*<sup>b</sup>Key Laboratory of Edible Oil Quality and Safety, State Administration for Market Regulation, Wuhan Institute for Food and Cosmetic Control, Wuhan 430040, China.*

*<sup>c</sup>No.1 Geological Team of Shandong Provincial Bureau of Geology and Mineral Resources, Jinan 250014, China.*

*<sup>d</sup>Changsha Normal University, Changsha 410100, China.*

*<sup>‡</sup>These authors contributed equally to this work.*

*\*To whom correspondence should be addressed. E-mail addresses:*  
*[slzhou@csnu.edu.cn](mailto:slzhou@csnu.edu.cn) (Prof. S. L. Zhou); [xianjunlang@whu.edu.cn](mailto:xianjunlang@whu.edu.cn) (Prof. X. J. Lang).*

## 1. Typical procedure for the photocatalytic selective oxidation of benzyl alcohol

In the 10 mL Pyrex reactor with 0.3 mmol of benzyl alcohol, 50 mg of Nb<sub>2</sub>O<sub>5</sub> nanowires, and 1 mL of CH<sub>3</sub>CN were added in turn. The prepared mixture was then maintained, under ultrasonication for 10 min and stirred for 20 min in the dark, to achieve adsorption equilibrium. Then, connected to air by punching a hole in the rubber septum. Next, the Pyrex reactor was stirred at 1500 rpm under violet LEDs (light-emitting diodes, 3 W × 4) irradiation. Finally, Nb<sub>2</sub>O<sub>5</sub> was stripped away from the reaction mixture by centrifugation. The liquid product was tested by GC–FID. The liquid products were certified by comparing the retention time of the standard sample and further certified by GC–MS.

## 2 Instrumentations

Transmission electron microscopy (TEM) and high-resolution TEM images were collected on a JEOL JEM2012–FEF operated at 200 kV. Powder X-ray diffraction (PXRD) measurement was carried out using a Rigaku/Miniflex 600 diffractometer with filtered Cu K $\alpha$  radiation, and the data were collected from 10° to 80°. X-ray photoelectron spectroscopy (XPS) measurements were taken on a Thermo Scientific K–Alpha using monochromatic Al K $\alpha$  radiation ( $h\nu = 1486.6\text{eV}$ ). The UV-vis absorbance of Nb<sub>2</sub>O<sub>5</sub> and BA–Nb<sub>2</sub>O<sub>5</sub> samples were measured on UV–3600 UV-vis spectrophotometer (Shimadzu, Japan) equipped with a diffuse reflectance measurement accessory, BaSO<sub>4</sub> was used as a reflectance standard. The specific surface areas were determined by N<sub>2</sub> physisorption using an ASAP automated system and the Brunauer–

Emmet–Teller (BET) method. Each sample was degassed under vacuum ( $<1 \times 10^{-5}$  bar) in the Micromeritics system at 300 °C for 6 h prior to N<sub>2</sub> physisorption. The electron paramagnetic resonance (EPR) tests were executed on an EPR spectrometer (JEOL, JES–FA300). Gas chromatography (GC) quantitative measurements of the conversions of substrates and the selectivity of products were carried out on a gas chromatograph equipped with a flame ionization detector (GC–FID, Agilent 7890B) using high purity N<sub>2</sub> as the carrier gas. Gas chromatography-mass spectrometry (GC–MS) analysis was performed on an Agilent GC 8890 gas chromatograph equipped with an Agilent 5977B GC/MSD mass spectrometer. Conversion and selectivity for selective oxidation of substrates to target products were defined as follows:

$$\text{Conv. (\%)} = [(C_0 - C_s)/C_0] \times 100$$

$$\text{Sel. (\%)} = [C_p/(C_0 - C_s)] \times 100$$

where  $C_0$  is the initial concentration of reactant,  $C_s$  and  $C_p$  are the concentrations of substrate and target product, respectively, at a certain time during the photocatalytic reaction.

### 3. Results

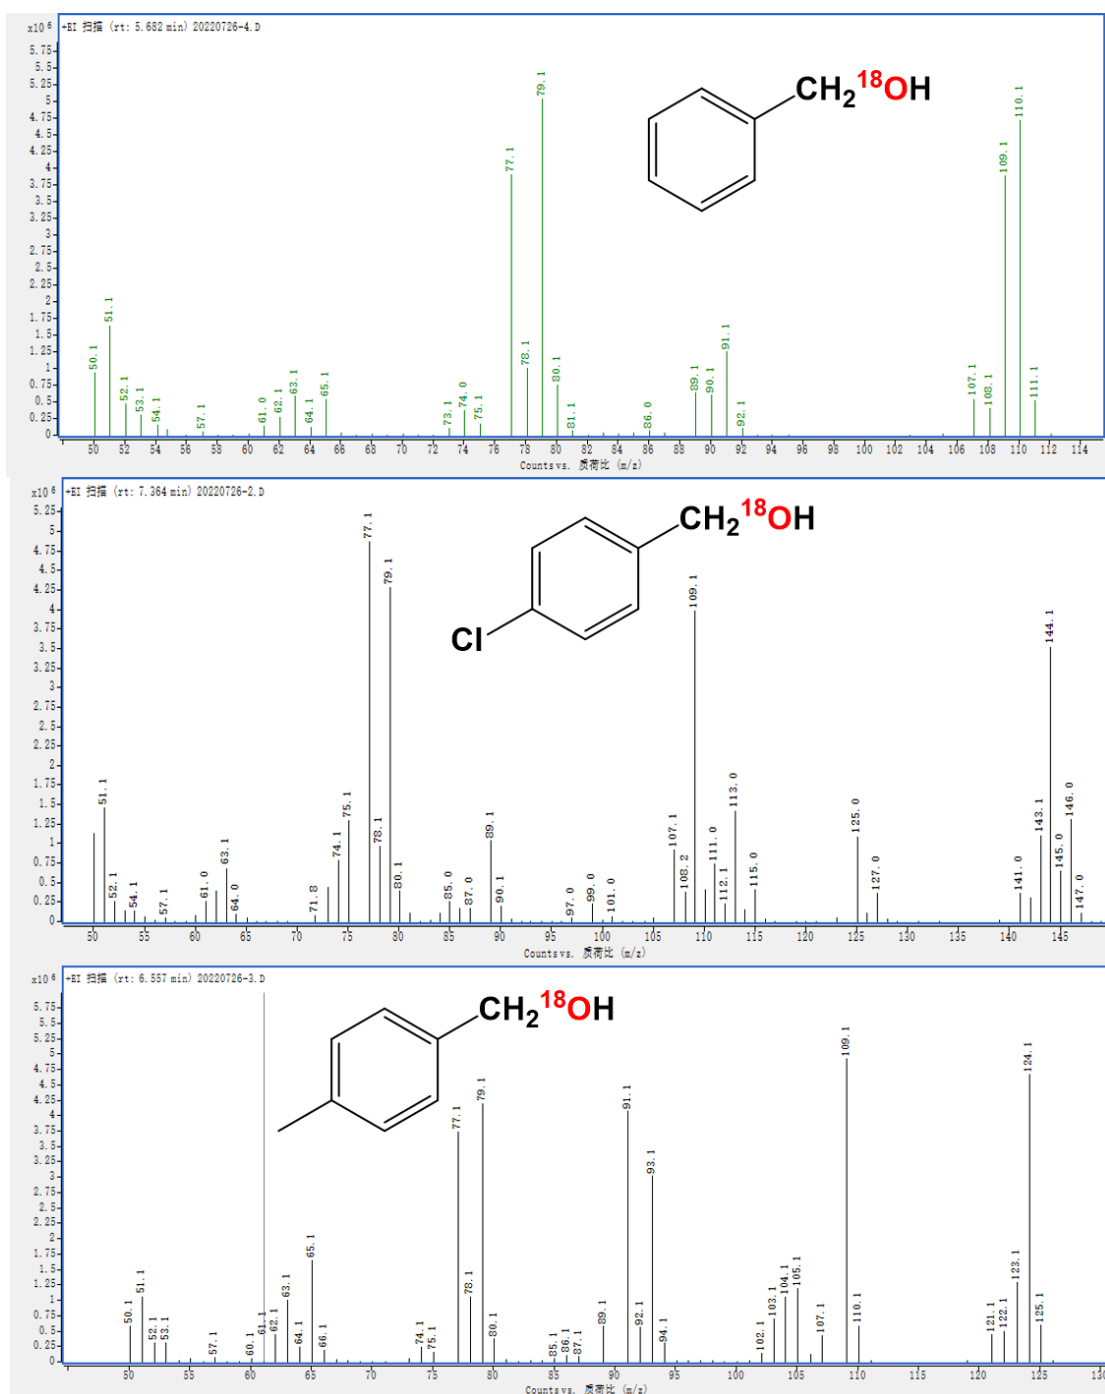

**Fig. S1.** The raw mass spectra of  $^{18}\text{O}$ -labeled benzaldehyde,  $^{18}\text{O}$ -labeled *p*-tolualdehyde, and  $^{18}\text{O}$ -labeled *p*-tolualdehyde.

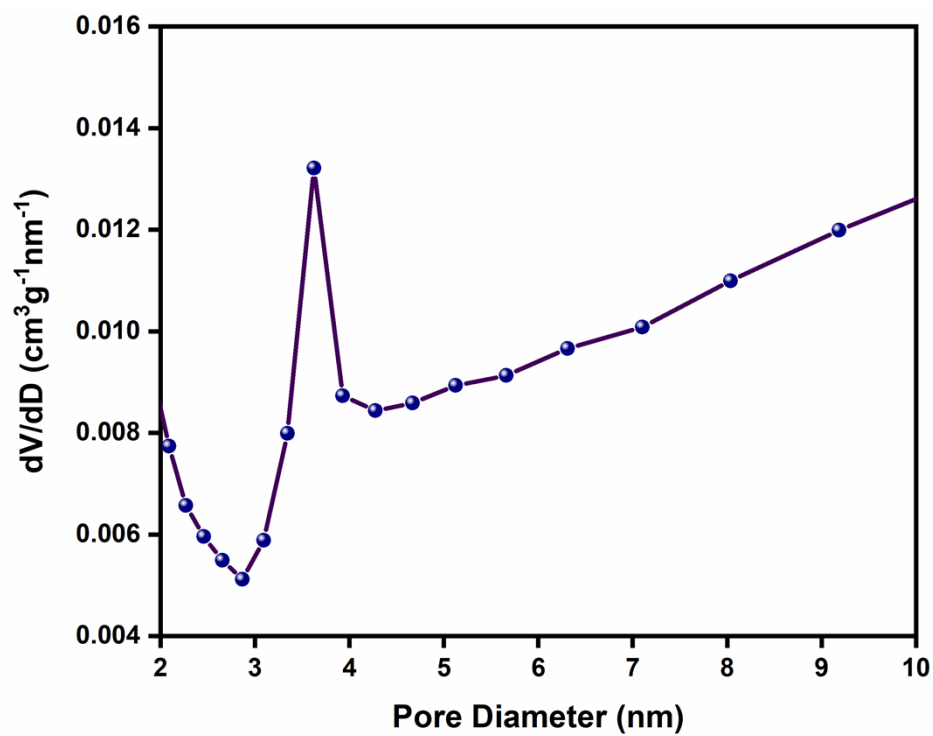

**Fig. S2.** BJH pore size distribution of the Nb<sub>2</sub>O<sub>5</sub> nanowires.

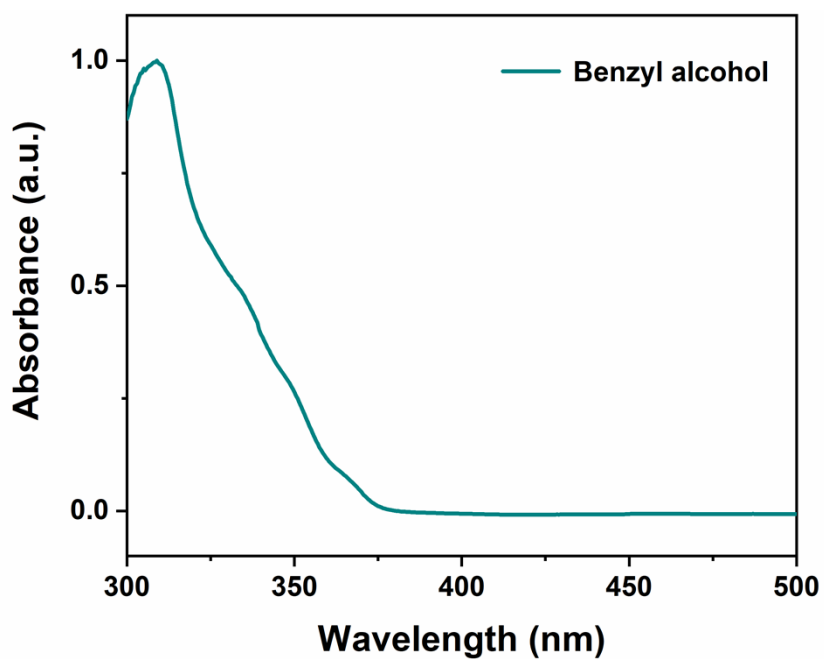

**Fig. S3.** UV-vis DRS of benzyl alcohol (BA).

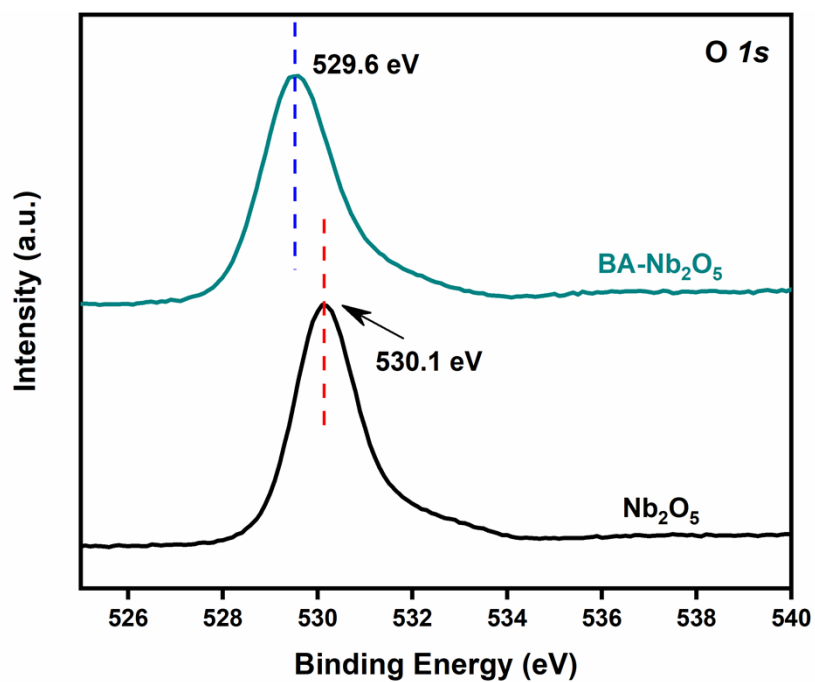

**Fig. S4.** O 1s XPS spectra of Nb<sub>2</sub>O<sub>5</sub> and BA-Nb<sub>2</sub>O<sub>5</sub>.

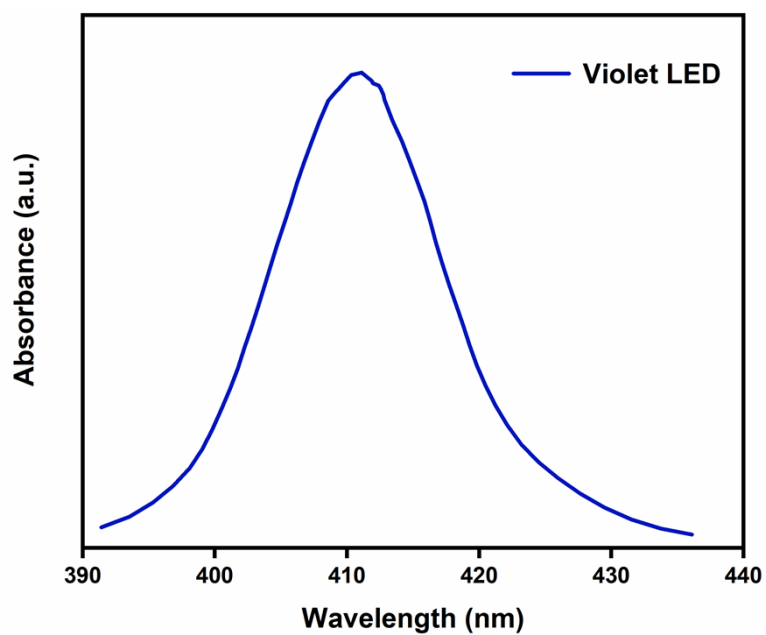

**Fig. S5.** The emission spectrum of the violet LED.

**Table S1** Abundance of  $^{18}\text{O}$  in the substrates and products.<sup>a</sup>

| Entry | Substrate<br>( $^{18}\text{O}$ : $^{16}\text{O}$ )                                | t (min) | Conv. (%) | Sel. (%) | Product<br>( $^{18}\text{O}$ : $^{16}\text{O}$ ) |
|-------|-----------------------------------------------------------------------------------|---------|-----------|----------|--------------------------------------------------|
| 1     | 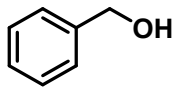 | 30      | 48        | 99       | 23:77                                            |
| 2     | (95:5)                                                                            | 45      | 64        | 99       | 18:82                                            |
| 3     |  | 30      | 52        | 99       | 22:78                                            |
| 4     | (92:8)                                                                            | 45      | 73        | 99       | 22:78                                            |
| 5     |  | 30      | 41        | 99       | 20:80                                            |
| 6     | (91:9)                                                                            | 45      | 53        | 99       | 18:82                                            |

<sup>a</sup>Standard reaction conditions:  $^{18}\text{O}$ -labeled alcohol (0.2 mmol),  $\text{Nb}_2\text{O}_5$  (50 mg), violet LEDs ( $410 \pm 6$  nm, 3 W  $\times$  4),  $\text{O}_2$  (0.1 MPa), anhydrous  $\text{CH}_3\text{CN}$  (1 mL).

**Table S2** Abundance of  $^{18}\text{O}$  in the substrates and products with the introduction of dry 3A molecular sieve.<sup>a</sup>

| Entry | Substrate<br>( $^{18}\text{O}$ : $^{16}\text{O}$ )                                           | <i>t</i> (min) | Conv. (%) <sup>a</sup> | Sel. (%) <sup>b</sup> | Product<br>( $^{18}\text{O}$ : $^{16}\text{O}$ ) |
|-------|----------------------------------------------------------------------------------------------|----------------|------------------------|-----------------------|--------------------------------------------------|
| 1     | 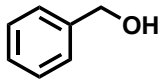<br>(95:5)  | 30             | 32                     | 99                    | 84:16                                            |
| 2     | <br>(92:8)  | 30             | 48                     | 99                    | 82:18                                            |
| 4     | <br>(92:8)  | 45             | 66                     | 99                    | 80:20                                            |
| 5     | <br>(91:9) | 30             | 24                     | 99                    | 74:26                                            |
| 6     | <br>(91:9) | 45             | 44                     | 99                    | 72:28                                            |

<sup>a</sup>Standard reaction conditions:  $^{18}\text{O}$ -labeled alcohol (0.2 mmol),  $\text{Nb}_2\text{O}_5$  (50 mg), violet LEDs ( $410 \pm 6$  nm, 3 W  $\times$  4),  $\text{O}_2$  (0.1 MPa), anhydrous  $\text{CH}_3\text{CN}$  (1 mL), dry molecular sieve 3A.



**Table S3.** Control experiments for the selective photocatalytic aerobic oxidation of benzyl alcohol.<sup>a</sup>

| Entry | Deviation from standard conditions | Conv. (%) <sup>b</sup> | Sel. (%) <sup>b</sup> |
|-------|------------------------------------|------------------------|-----------------------|
| 1     | Blank                              | 0                      | --                    |
| 2     | Dark                               | 0                      | --                    |
| 3     | N <sub>2</sub>                     | 1                      | --                    |
| 4     | None                               | 61                     | 99                    |

<sup>a</sup>Standard reaction conditions: benzyl alcohol (0.3 mmol), Nb<sub>2</sub>O<sub>5</sub> (50 mg), violet LEDs (410 ± 6 nm, 3 W × 4), aerial O<sub>2</sub>, CH<sub>3</sub>CN (1 mL), 2 h.

<sup>b</sup>Determined by GC–FID using chlorobenzene as the internal standard.
